# Supplementary figures and images for: A Randomized, Double‐Blind, Placebo‐Controlled, Multiple Dose Escalation Study to Evaluate the Safety and Pharmacokinetics of ELX‐02 in Healthy Subjects
Source: PubMed Central journal article supplement — Clin Pharmacol Drug Dev. 2021 Jan 19;10(8):859–69. doi: 10.1002/cpdd.914 (PMC8451797; doi:10.1002/cpdd.914), 2021-01-19

# Supplemental Content FB: Boxplot of Tmax by Dose on Day 1 and Day 29

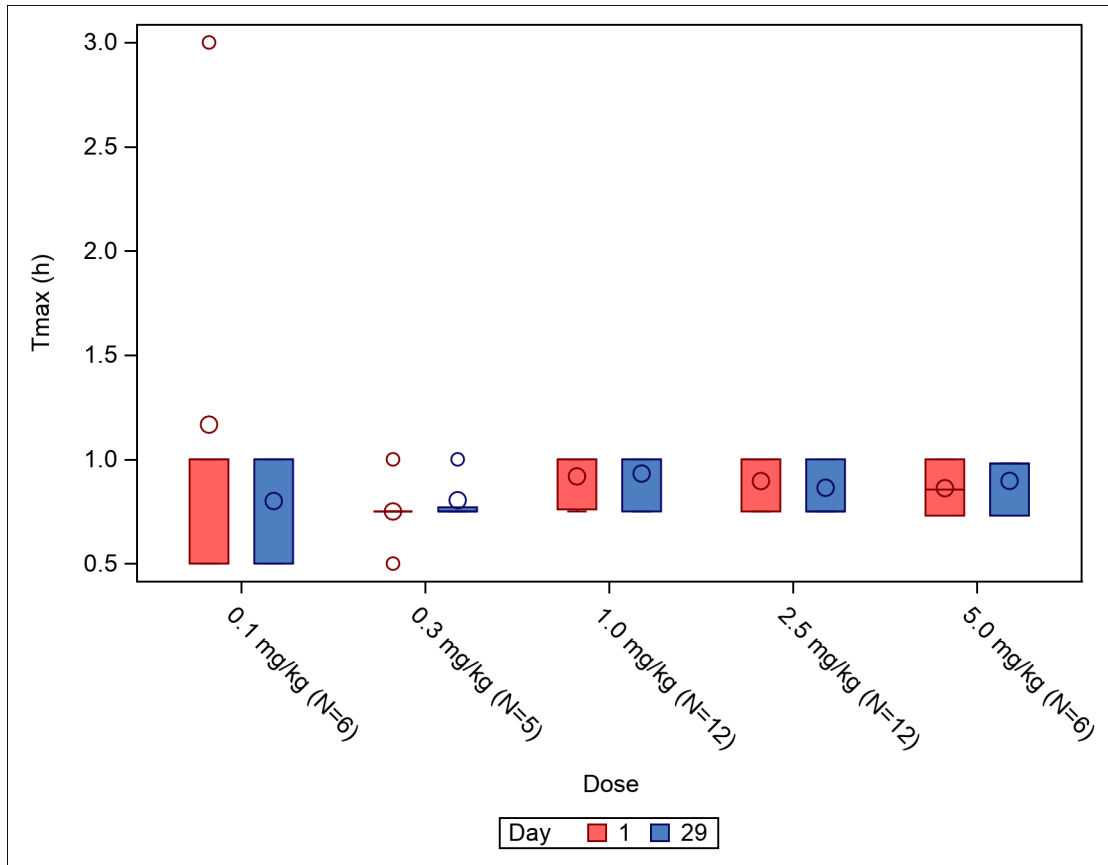

Supplement: CPDD-10-859-s003.pdf [file CPDD-10-859-s003.pdf]

# Supplemental Content FA: CONSORT Flow Diagram

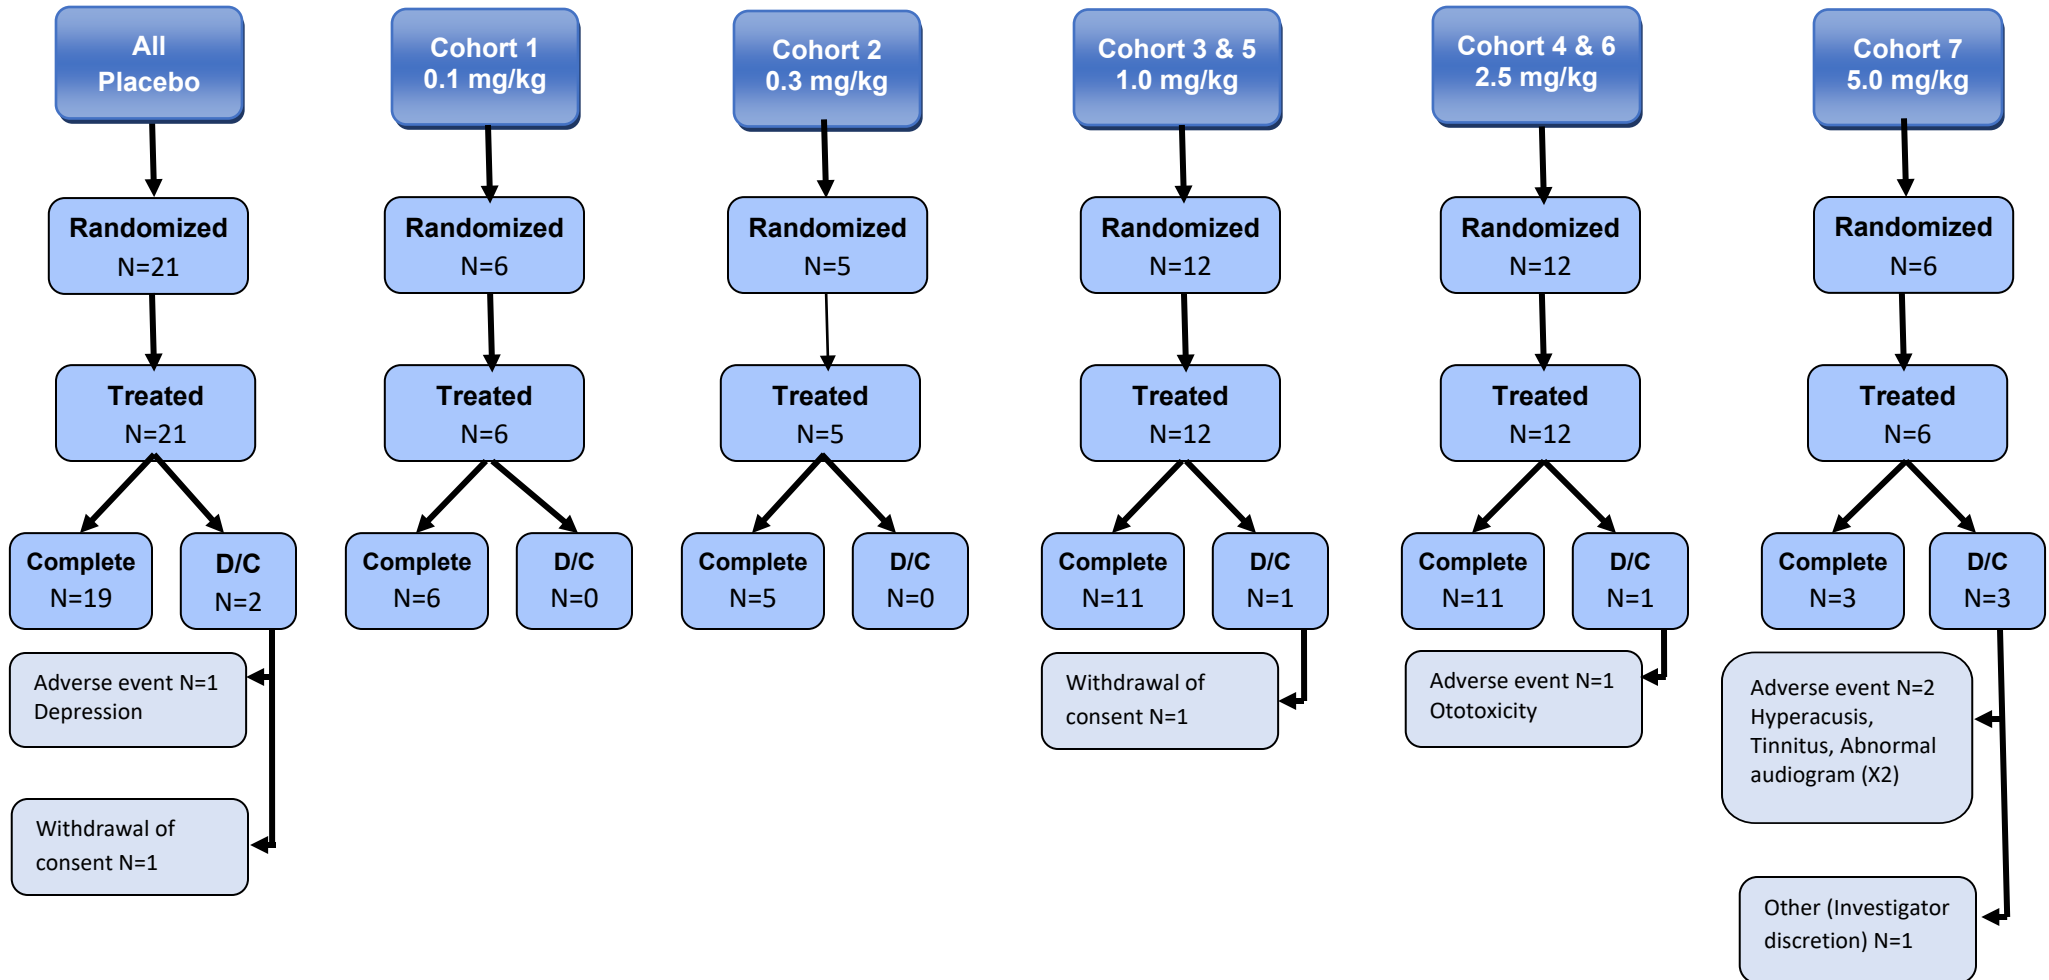

Supplement: CPDD-10-859-s004.pdf [file CPDD-10-859-s004.pdf]
